## Intraoperative Heat Conservation Using a Reflective Blanket

DENIS L. BOURKE, M.D.,\* HEINRICH WURM, M.D.,† MORTON ROSENBERG, D.M.D.,‡ JULIE RUSSELL, R.N.§

Heat loss and hypothermia are common intraoperative complications.<sup>1-5</sup> The ill effects of hypothermia, especially in the immediate postoperative period, have been described by other authors.<sup>5-9</sup> Attempts to reduce heat loss have included variations in anesthetic circuits; low flow, closed, to and fro, and heated humidifiers; radiant heaters; increased ambient temperature; active warming blankets; and reflecting blankets.<sup>4,6,10-16</sup> Studies of the effectiveness of reflecting blankets in reducing radiant heat loss have shown conflicting results.<sup>4,16-19</sup> Since radiant heat loss is usually the major source of heat loss in an anesthetized patient, we studied the effectiveness of another reflective blanket, aluminized Tyvek, type 1443,<sup>¶</sup> which is used as lining in survival apparel.

## METHODS

With the approval of our hospital's Committee for the Protection of Human Subjects, we studied two groups of patients. Group 1 consisted of 60 consecutive ASA Class I or II patients scheduled for elective carotid endarterectomy. Patients were assigned randomly to either a control group for whom standard operating room draping was used or to a test group. Test patients were wrapped as completely as possible in the aluminized blanket; surgical draping was the same as for control patients. Group 2 consisted of 30 consecutive ASA Class I or II patients scheduled for neurosurgical procedures anticipated to be longer than 3 h. Patients were assigned randomly to a control or test group. All patients were placed on an active heating blanket whose temperature had equi-

brated with ambient temperature. Test patients were wrapped in the aluminized blanket as completely as positioning would allow; test and control patients were draped in standard manner.

For test patients in Groups 1 and 2, a copper cable connected the aluminized blanket to the operating table to prevent patient isolation. Patient temperature, monitored with an esophageal temperature probe,<sup>20</sup> operating room temperature, and relative humidity were recorded at half-hour intervals. Other aspects of anesthetic management were left to the discretion of the responsible anesthesiologist. Patients were observed for shivering in the recovery room by a nurse blinded to the treatment. Observations were subjected to chi-square analysis. Temperature and humidity data were examined by analysis of variance. All results are reported as significant if  $P < 0.05$ .

## RESULTS

*Carotid Endarterectomy Group.* No problems were reported as a result of using the aluminized blanket in any patient. Control and test patients were similar with respect to age, weight, body surface area, ASA class, preoperative medications, anesthetic technique, and absence of other diseases. There were no differences in operating room temperature or humidity. The blanket covered  $80 \pm 5\%$  (mean  $\pm 1$  SD) of the patient's body surface.<sup>21</sup> Initial patient temperatures were the same in the test and control groups (fig. 1). Within 30 min, the test patients' temperatures had risen above initial temperature and remained so throughout the operative period. Control patients' temperatures dropped below the initial temperature at 30 and 60 min, but they were not below the initial temperature thereafter. Recovery room shivering occurred in 16 control patients and in five test patients ( $P < 0.05$ ).

*Neurosurgical Group.* As in the patients undergoing carotid endarterectomy, there were no differences between control and test patients with respect to patient population, operating room environment, or anesthetic technique. Initial patient temperatures were similar for control and test patients (fig. 2). In the test patients,  $62 \pm 8\%$  (mean  $\pm 1$  SD) of body surface area was covered, and temperatures did not fall below initial values throughout the 4-h study period. Control patients' temperatures were below initial at 1, 2, and 3 h. In the control group, active

\* Associate Professor, The University of Texas Health Science Center at Houston.

† Assistant Professor, Tufts School of Medicine.

‡ Associate Professor, Tufts School of Medicine.

§ Staff Nurse, New England Medical Center Hospital.

Received from the Department of Anesthesiology, The University of Texas Health Science Center at Houston, Houston, Texas, the Department of Anesthesiology, Tufts School of Medicine, Boston, Massachusetts, and the Department of Anesthesiology, New England Medical Center Hospital, Boston, Massachusetts. Accepted for publication July 1, 1983.

Address reprint requests to Dr. Bourke: Department of Anesthesiology, University of Texas Health Science Center, MSMB 5.020, Houston, Texas 77030.

Key words: Temperature: body. Equipment: reflective heating blanket.

¶ King-Seeley Thermos Co., 37 East St., Winchester, Massachusetts 01890.

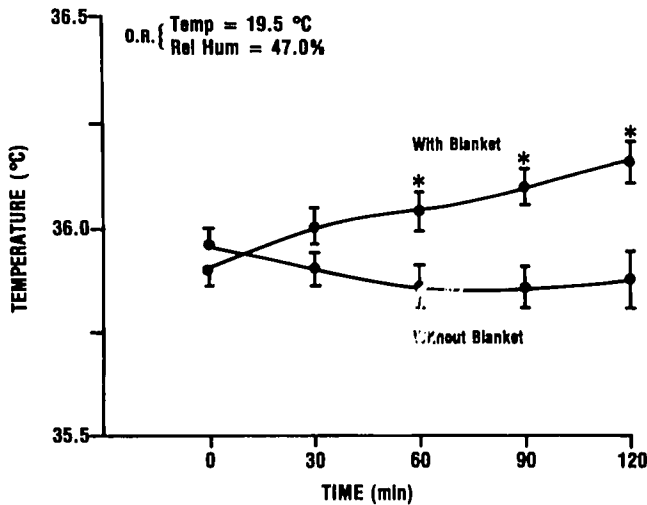

FIG. 1. Esophageal temperatures for carotid endarterectomy patients with and without reflective blanket. \* indicates significant change from control,  $P < 0.05$ ,  $N = 30$  for each group.

warming blankets were turned on between the third and fourth hours to correct the lower temperatures. There were no differences between control and test patients' temperatures on admission to the recovery room. Since the tracheas of some neurosurgical patients remained intubated and they were paralyzed, we could not assess postoperative shivering.

DISCUSSION

Body temperature is determined by the balance between heat production and heat loss. Euthermia is maintained by the body's ability to vary heat production and to conserve heat. An anesthetized patient, with a relatively

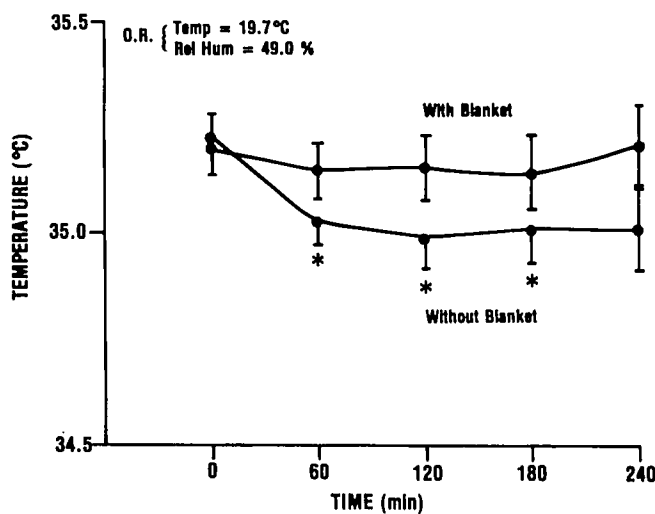

FIG. 2. Esophageal temperatures for neurosurgical patients with and without reflective blanket. \* indicates significant difference between groups,  $P < 0.05$ ,  $N = 15$  for each group.

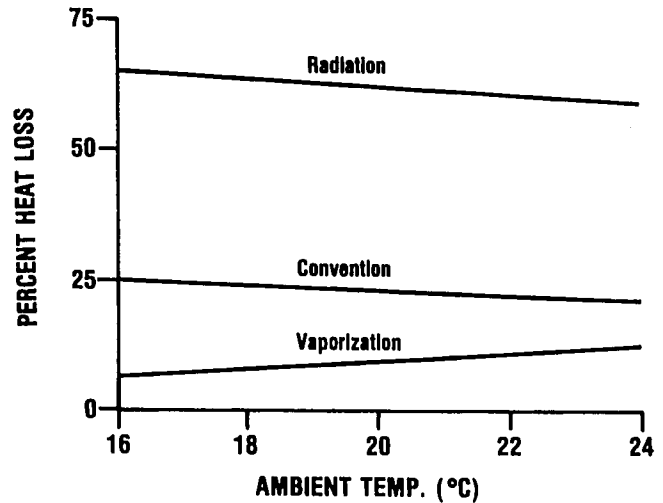

FIG. 3. Theoretic percentages of heat loss through various mechanisms at varying ambient temperatures for an undraped patient. See Appendix for equations.

low metabolic rate and minimal control over heat loss, is obviously at a disadvantage. Metabolic heat production in an anesthetized normal adult male is 60–70 kcal/h.<sup>22–24</sup> Heat is lost through four parallel pathways: conduction, evaporation, convection, and radiation. Of these, conduction and evaporation cause the fewest intraoperative problems. Conductive loss is minimal (less than 10%) because of the low specific heat and conductivity of the drapes and mattresses. Although evaporative heat loss (*i.e.*, insensible perspiration plus evaporation from the respiratory tract) is approximately 25 kcal/h, the loss can be reduced to 10–15 kcal/h by using moist warm-inspired gases.

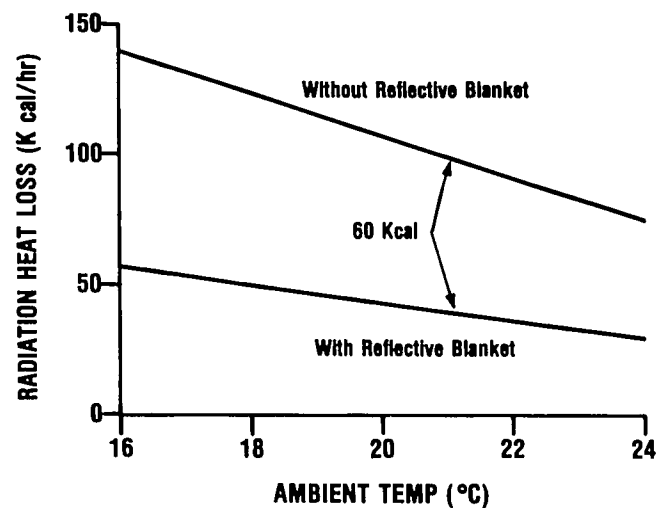

FIG. 4. Theoretic radiant heat loss from a surgical patient with and without a reflective blanket covering 80% of the body and reflecting 80% of incident photons. At an ambient temperature of 21° C the blanket conserves 60 kcal/h. See Appendix for equations.

The major causes of heat loss in the operating room are convection and radiation<sup>4,24,25</sup> (fig. 3). Convective heat loss is a function of ambient temperature and the square root of air velocity (see Appendix). In a 21° C operating room, an exposed patient's convective heat loss can be 80 kcal/h. By reducing both the velocity and volume of interacting air, surgical draping usually decreases this loss to about 20 kcal/h.<sup>19,24,26</sup>

Since the human body is nearly a perfect emitter/absorber at the wavelengths important for thermal exchange and since the probability of photon reflection is nearly zero in the typical operating room, radiant heat loss is a direct function of the difference between patient and ambient temperature.<sup>22,24</sup> Therefore, using a blanket that reflects 80% of radiated heat in a 21° C operating room can reduce radiant heat loss from 100 to 40 kcal/h (fig. 4).

We are unable to explain the equivocal results of other investigators examining the use of the "space blanket." However, our study results are in concert with the above discussion. Although using the blanket results in small temperature differences, each degree centigrade represents the equivalent of approximately 1 hour's normal heat production. Replacing this deficit can put considerable stress on a patient's oxygen delivery system. Unless hypothermia is an essential element of the surgical procedure, it probably should be prevented from the outset. Prevention is best accomplished by maintaining high ambient temperatures when the body is exposed during prepping. Continued high ambient temperatures, however, are unnecessarily uncomfortable for surgeons and scrub nurses. Moreover, after the patient is draped, convective heat loss decreases. Thus euthermia can be maintained by various methods despite lower ambient temperatures.

We recommend using a reflective blanket when more than 60% of a patient's body surface can be covered and when the procedure is likely to last 2 h or longer. Reflective blankets cannot burn patients, are not subject to mechanical or electrical failures, and are lightweight, clean, and disposable. The following additional points should be noted: 1) the blanket does not interfere with radiologic procedures; our radiologists did not detect any loss of quality in x-rays exposed through as many as 16 layers of the Tyvek 1443 blanket; 2) because the blanket is perforated, it does not trap moisture that could condense and cause skin maceration during prolonged use; and 3) using a metalized blanket does not increase the risk associated with undetected electrocautery dispersion plate faults.\*\*

\*\* Personal communication: John Clark, Ph.D., Professor of Electrical Engineering, Rice University, Houston, Texas.

## APPENDIX

### Abbreviations

|       |                               |
|-------|-------------------------------|
| $H_C$ | convective heat loss (kcal/h) |
| $H_R$ | radiation heat loss (kcal/h)  |
| $K_C$ | constant                      |
| $K_R$ | universal radiation constant  |
| $A$   | body surface area             |
| $e$   | emissivity                    |
| $T$   | temperature absolute          |

### Convection

Convective heat loss can be expressed as:

$$H_C = K_C A (T_1 - T_2).$$

$K_C$  includes constants for the characteristics of the interacting gas and, in particular, a factor that varies directly as the square root of the interacting gas velocity.  $K_C$  for air and an exposed patient in a typical operating room is about 5, while the reduction in air velocity caused by drapes can lower  $K_C$  to about 2.

### Radiation

A form of the Stefan-Boltzman equation that expresses the rate of radiant heat transfer between two interacting bodies is:

$$H_R = K_R A e (T_1^4 - T_2^4) \text{ (kcal/h)}.$$

Factoring  $(T_1^4 - T_2^4)$  yields  $(T_1 - T_2)(T_1^3 + T_1^2 T_2 + T_1 T_2^2 + T_2^3)$ . Consider the second factor: let skin temperature,  $T_1$ , be 33° C (306° A). Let ambient temperature,  $T_2$ , be 20° C (293° A) and 27° C (300° A); if the second factor is evaluated for both values of  $T_2$ , the results are within 4% of each other. The factor  $(T_1 - T_2)$ , however, changes considerably under the same conditions. If the second factor is replaced by a representative value and incorporated into the constant  $K_R$ , the equation simplifies to:

$$H_R = K_R A e (T_1 - T_2).$$

$e$  is a function of the emissivities, absorptivities, shapes, and distance between the interacting bodies. Emissivity and absorptivity may be considered equal for a particular wave length and a constant temperature and expressed as  $C$ . There are a number of expressions for  $e$ , but the results are similar. In the following expression the patient is considered a cylinder within a cylindrical operating room.<sup>7</sup>

$$e = \frac{1}{\frac{1}{C_1} + \frac{r_1}{r_2} \left( \frac{1}{C_2} - 1 \right)}$$

Under the usual conditions, the patient's emissivity,  $C_1$ , is nearly equal to 1; the operating room's emissivity,  $C_2$ , is nearly 1; and the patient's radius,  $r_1$ , is much smaller than the approximate operating room cylindrical radius,  $r_2$ . Thus  $e \rightarrow 1$ . However, if the patient is wrapped in a blanket that reflects 80% of the emitted photons, then  $C_2$  equals 0.2;  $r_1$  and  $r_2$  are nearly equal; and  $e \rightarrow 0.20$ . Therefore, as a theoretic approximation, and all other factors being equal, heat loss would be reduced by 80%.

## REFERENCES

1. Morris RH: Operating room temperature and the anesthetized, paralyzed patient. *Arch Surg* 102:95-97, 1971
2. Holdcroft A, Hall GM: Heat loss during anaesthesia. *Br J Anaesth* 50:157-164, 1978
3. Crocker BD, Okumura F, McCuaig DI, Denborough MA: Temperature monitoring during general anaesthesia. *Br J Anaesth* 52:1223-1229, 1980
4. Dyde JA, Lunn HF: Heat loss during thoracotomy. *Thorax* 25:355-358, 1970
5. Carli F, Clark MM, Woollen JW: Investigation of the relationship between heat loss and nitrogen excretion in elderly patients undergoing major abdominal surgery under general anaesthetic. *Br J Anaesth* 54:1023-1028, 1982
6. Tausk HC, Miller R, Roberts RB: Maintenance of body temperature by heated humidification. *Anesth Analg* 55:5, 719-723, 1976
7. Roe CF, Goldberg MJ, Blair CS, Kinney JM: The influence of body temperature on early postoperative oxygen consumption. *Surgery* 60:1, 85-92, 1966
8. Hall GM: Body temperature and anaesthesia. *Br J Anaesth* 50:39-44, 1978
9. Rodbard D: The role of regional body temperature in the pathogenesis of disease. *N Engl J Med* 305:808-814, 1981
10. Stone DR, Downs JB, Paul WL, Perkins HM: Adult body temperature and heated humidification of anesthetic gases during general anesthesia. *Anesth Analg* 60:736-741, 1981
11. Roizen MF, Sohn YJ, L'Hommedieu CS, Wylie EJ, Ota MK: Operating room temperature prior to surgical draping: effect on patient temperature in recovery room. *Anesth Analg* 59:852-855, 1980
12. Clark RE, Orkin LR, Rovenstine EA: Body temperature studies in anesthetized man. *JAMA* 154:311-319, 1954
13. Morris RH, Wilkey BR: The effects of ambient temperature on patient temperature during surgery not involving body cavities. *ANESTHESIOLOGY* 32:102-107, 1970
14. Morris RH, Kumar A: The effect of warming blankets on maintenance of body temperature of the anesthetized, paralyzed adult patient. *ANESTHESIOLOGY* 36:408-411, 1972
15. Hendrickx HH: Paradoxical inhibition of decreases in body temperature by use of heated and humidified gases. Letter. *Anesth Analg* 61:393-394, 1982
16. Radford P, Thurlow AC: Metallized plastic sheeting in the prevention of hypothermia during neurosurgery. *Br J Anaesth* 51:237-240, 1979
17. Cundy JM: Metallized plastic sheeting. Letter. *Br J Anaesth* 52:359, 1979
18. Radford P: Metallized plastic sheeting. Letter. *Br J Anaesth* 52:359, 1979
19. Hill DW: Metallized plastic sheeting. Letter. *Br J Anaesth* 52:359, 1979
20. Cork RC, Vaughan RW, Humphrey LS: Precision and accuracy of intraoperative temperature monitoring. *Anesth Analg* 62:211, 214, 1983
21. Dunphy JE, Way LW: *Current Surgical Diagnosis and Treatment*. Los Altos, Lange, 1977, pp 226-228
22. Hardy JD, Hilhorat AT, DuBois EF: Basal metabolism and heat loss of young women at temperatures from 22° C to 35° C. *J Nutrition* 21:583-403, 1941
23. Selkurt EE, ed.: *Physiology*, 4th ed. Boston, Little Brown, 1976, p 577
24. Howell WH: *Physiology and Biophysics*, 20th ed. Philadelphia, WB Saunders, 1973, pp 105-112
25. Jensen D: *The Principles of Physiology*. New York, Appleton-Century-Crofts, 1980, pp 1005-1008
26. Shanks CA: Mean skin temperature during anaesthesia: An assessment of formulae in the supine surgical patient. *Br J Anaesth* 51:241-256, 1956
27. Stoever HJ: *Applied Heat Transmission*. New York, McGraw-Hill, 1941, pp 23-112
